# Supplementary material for: Combining topochemical [2+2] photoreactions and hydrothermal isomerisation for the regioselective and quantitative preparation ofrtct-pyridylcyclobutanes
Source: Royal Society of Chemistry journal article supplement (doi:10.1039/c2nj20855e), 2011-12-15

## Supplementary Material

---

### Combining topochemical [2+2] photoreactions and hydrothermal isomerisation for the regioselective and quantitative preparation of *rtct*-pyridylcyclobutanes

---

Yennifer Hill, Maholy Linares and Alexander Briceño,\*

*Instituto Venezolano de Investigaciones Científicas, (IVIC), Apartado 21827, Caracas, 1020-A, Venezuela. Laboratorio de Síntesis y Caracterización de Nuevos Materiales, Centro de Química.*

#### 1. Experimental Section

#### 2. List of Figures

**Figure 1.** Ball and stick representation of the pyridylcyclobutanes found in the structure of **5** (*rtct*-4,4'-tpcb (a)), **6** (*rtct*-2,4'-tpcb-ht (b)) and **7** (*rcct*-4-Cl-dpcb-ht)

**Figure 2.** <sup>1</sup>H NMR spectrum of the starting *rcct*-pyridylcyclobutanes *rcct*-2,2'-tpcb (a), *rcct*-4,4'-tpcb (b), *rcct*-2,4'-tpcb-ht(c), *rcct*-2,4'-tpcb-hh (d).

**Figure S3.** (a) <sup>1</sup>H-NMR spectrum of the mixture of products (*rcct*- and *rtct*- 2,2'-tpcb isomers) obtained from the reflux with MnCl<sub>2</sub>·4H<sub>2</sub>O. (b) <sup>1</sup>H-NMR spectrum of the mixture of products (*rcct*- and *rtct*- 2,2'-tpcb isomers) obtained from the reflux with AlCl<sub>3</sub>·6H<sub>2</sub>O.

**Figure S4.** (a) <sup>1</sup>H-NMR spectrum of the isomer *rcct*-4,4'-tpcb obtained from the reflux with MnCl<sub>2</sub>·4H<sub>2</sub>O. (b) <sup>1</sup>H-NMR spectrum of the mixture of products (*rcct*- and *rcct*- 4,4'-tpcb isomers) obtained from the reflux with AlCl<sub>3</sub>·6H<sub>2</sub>O.

**Figure S5.** (a) <sup>1</sup>H-NMR spectrum of the mixture of products (*rcct*- and *rcct*- 2,4'-tpcb-ht isomers) obtained from the reflux with MnCl<sub>2</sub>·4H<sub>2</sub>O. (b) <sup>1</sup>H-NMR spectrum of the mixture of products (*rcct*-, *rttt* and *rcct*- 2,4'-tpcb-ht isomers) obtained from the reflux with AlCl<sub>3</sub>·6H<sub>2</sub>O.

**Figure S6.** a) <sup>1</sup>H-NMR spectrum of the mixture of products (*rcct*- and *rcct*- 2,4'-tpcb-hh isomers) obtained from the reflux with MnCl<sub>2</sub>·4H<sub>2</sub>O. (b) <sup>1</sup>H-NMR spectrum of the mixture of products (*rcct*-, and *rcct* 2,4'-tpcb-hh isomers) obtained from the reflux with AlCl<sub>3</sub>·6H<sub>2</sub>O.

**Figure S7.** Comparative <sup>1</sup>H-NMR spectrum of the *rcct*-2,2'-tpcb isomer before (a) and after the heating upon hydrothermal conditions either with bta or AlCl<sub>3</sub>·6H<sub>2</sub>O. Representative <sup>1</sup>H-NMR spectrum of the *rtct*-2,2'-tpcb isomer (b).

**Figure S8.** Comparative  $^1\text{H-NMR}$  spectrum of the *rctt*-4,4'-tpcb isomer before (a) and after the heating upon hydrothermal conditions either with bta or  $\text{AlCl}_3 \cdot 6\text{H}_2\text{O}$ . Representative  $^1\text{H-NMR}$  spectrum of the *rtct*-4,4'-tpcb isomer (b).

**Figure S9.** Comparative  $^1\text{H-NMR}$  spectrum of the *rctt*-2,4'-tpcb-ht isomer before (a) and after the heating upon hydrothermal conditions either with bta or  $\text{AlCl}_3 \cdot 6\text{H}_2\text{O}$ . Representative  $^1\text{H-NMR}$  spectrum of the *rtct*-2,4'-tpcb-ht isomer (b).

**Figure S10.** Comparative  $^1\text{H-NMR}$  spectrum of the *rctt*-2,4'-tpcb-ht isomer before (a) and after the heating upon hydrothermal conditions either with bta or  $\text{AlCl}_3 \cdot 6\text{H}_2\text{O}$ . Representative  $^1\text{H-NMR}$  spectrum of the *rtct*-2,4'-tpcb-hh isomer (b).

**Figure S11.** Comparative  $^1\text{H-NMR}$  spectrum of the irradiated sample of  $(\text{bta}^{2-}) \cdot 2(4\text{-Cl-HStb}^+)$ , containing *rctt*-1,3-bis(4-pyridyl)-2,4-bis(4-chlorophenyl)cyclobutane head-to-tail (*rctt*-4-Cl-dpcb-ht) before (a).  $^1\text{H-NMR}$  spectrum of the mixture of products (*rctt*-, and isomers) obtained after the heating upon hydrothermal conditions with bta (b). T = template (bta); \* = *rctt*-isomer)

## 1. Experimental Section

All reagents were obtained from commercial sources and used without further purification. The  $^1\text{H}$  NMR spectra were recorded on a Bruker AVANCE-300 Spectrometer in  $\text{CDCl}_3$ .

### Synthesis of *rctt*-pyridylcyclobutanes (tpcb)

The cyclobutane derivatives were prepared from controlled [2+2] cycloaddition reactions in the solid state of *trans*-bis(2-pyridyl)ethylene (**2,2'-bpe**), *trans*-bis(4-pyridyl)ethylene (**4,4'-bpe**), *trans*-1-(2-pyridyl)-2-(4-pyridyl)ethylene (**2,4'-bpe**) and 4-Chorostilbazole (**4-Cl-Stb**), according to previously published procedures (see reference section). The different photoproducts obtained were characterised before the hydrothermal reaction by NMR spectroscopy: ***rctt*-2,2'-tpcb** ( $^1\text{H}$  NMR (300 MHz,  $\text{CDCl}_3$ ),  $\delta_{\text{H}}$ (ppm),  $J$ (Hz): 8.42(4H<sub>a</sub>, ddd,  $J_{\text{ab}}=4.9$ ,  $J_{\text{ac}}=1.8$ ,  $J_{\text{ad}}=0.9$ ), 7.33(4H<sub>b</sub>, td,  $J_{\text{bc}}=7.7$ ,  $J_{\text{bd}}=1.8$ ), 6.9(4H<sub>c</sub>, ddd,  $J_{\text{cd}}=7.8$ ) 7.07(4H<sub>d</sub>, dd), and 5.13(4H<sub>e</sub>, s); ***rctt*-4,4'-tpcb** (300 MHz,  $\text{CDCl}_3$ ),  $\delta_{\text{H}}$ (ppm),  $J$ (Hz): 8.45(8H<sub>a</sub>, dd,  $J_{\text{ab}}=4.5$ ), 7.00(8H<sub>b</sub>, dd), and 4.48(4H<sub>c</sub>, s); ***rctt*-2,4'-tpcb-ht** (300 MHz,  $\text{CDCl}_3$ ),  $\delta_{\text{H}}$ (ppm),  $J$ (Hz): 8.43(2H<sub>a</sub>, ddd,  $J_{\text{ab}}=4.8$ ,  $J_{\text{ac}}=1.7$ ,  $J_{\text{ad}}=0.9$ ), 8.29(4H<sub>e</sub>, ddd,  $J_{\text{ef}}=6.0$ ), 7.42(2H<sub>c</sub>, td,  $J_{\text{bc}}=7.7$ ), 7-6.96(8H<sub>b,d,f</sub>, m,  $J_{\text{bd}}=1.8$ ,  $J_{\text{dc}}=7.5$ ), 4.86(2H<sub>g</sub>, td,  $J_{\text{gh}}=8.7$ ) and 4.71(2H<sub>h</sub>, td); ***rctt*-2,4'-tpcb-hh** (300 MHz,  $\text{CDCl}_3$ ),  $\delta_{\text{H}}$ (ppm),  $J$ (Hz): 8.44(2H<sub>a</sub>, ddd,  $J_{\text{ab}}=4.6$ ,  $J_{\text{ac}}=1.7$ ), 8.34(4H<sub>e</sub>, ddd,  $J_{\text{ef}}=6.0$ ), 7.39(2H<sub>b</sub>, td,  $J_{\text{bc}}=7.7$ ), 7.04(4H<sub>f</sub>, dd), 6.97-6.94(4H<sub>c,d</sub> m), 4.94(2H<sub>g</sub>, td,  $J_{\text{gh}}=6.4$ ) and 4.60(2H<sub>h</sub>, td); ***rctt*-4-Cl-dpcb-ht**: [*rctt*-1,3-bis(4-pyridyl)-2,4-bis(4-

chlorophenyl) cyclobutane head-to-tail] (300 MHz, DMSO),  $\delta_{\text{H}}$ (ppm),  $J$ (Hz): 8.38(4H<sub>a</sub>, d,  $J_{\text{ab}}=4.7$ ), 8.02(2H, s, template (bta)), 7.27(4H<sub>c</sub>, d,  $J_{\text{cd}}=6.1$ ) 7.21(8H<sub>b,d</sub>, s), and 4.57(4H<sub>e,d</sub>, m).

### General procedure for the isomerisation of *rcct*-pyridylcyclobutanes derivatives (tpcb) under reflux in presence of metal salts (MnCl<sub>2</sub>·4H<sub>2</sub>O and AlCl<sub>3</sub>·6H<sub>2</sub>O).

A round-bottom flask was charged with the different *rcct*-tpcb (60 mg) dissolved in methanol (10 mL), and combined with MnCl<sub>2</sub>·4H<sub>2</sub>O (55 mg) or AlCl<sub>3</sub>·6H<sub>2</sub>O (66 mg) in 1:2 molar ratio previously dissolved in water (20 mL), respectively. The mixture was refluxed (T=80-82°C) for 24 h and after slow cooling to room temperature. The products were extracted with CH<sub>2</sub>Cl<sub>2</sub> and characterised by <sup>1</sup>H-NMR spectroscopy.

### General procedure for the isomerisation of *rcct*-pyridylcyclobutanes derivatives (tpcb) under hydrothermal conditions

A mixture was prepared by adding of 1,2,4,5 benzenetetracarboxylic acid (bta, 46mg) or AlCl<sub>3</sub>·6H<sub>2</sub>O (66mg) and each pyridyl compounds (50mg), respectively in 1:2 molar ratio in 10 mL of H<sub>2</sub>O. These mixtures were heated at 140°C for 24-48h. Slow evaporation of the resulting solutions at room temperature gave crystals of good quality for X-ray single crystal analysis of 1-3. The crude product were extracted with CH<sub>2</sub>Cl<sub>2</sub> or after the dissolution of solid phases in a NaOH solution (pH~ 12) and after the extraction with CH<sub>2</sub>Cl<sub>2</sub>. All the products were characterised by <sup>1</sup>H-NMR. ***rtct-2,2'-tpcb***: <sup>1</sup>H NMR (300 MHz, CDCl<sub>3</sub>),  $\delta_{\text{H}}$ (ppm),  $J$ (Hz): 8.66(4H<sub>a</sub>, ddd,  $J_{\text{ab}}=5.8$ ,  $J_{\text{ac}}=1.9$ ,  $J_{\text{ad}}=0.9$ ), 7.54(4H<sub>c</sub>, td), 7.19 (4H<sub>b</sub>, td,  $J_{\text{bc}}=7.1$ ,  $J_{\text{bd}}=1.4$ ), 7.13(4H<sub>d</sub>, d) and 4.37(4H<sub>e</sub>, s). ***rtct-4,4'-tpcb***: <sup>1</sup>H NMR (300 MHz, CDCl<sub>3</sub>),  $\delta_{\text{H}}$ (ppm),  $J$ (Hz): 8.57(8H<sub>a</sub>, dd,  $J_{\text{ab}}=6.0$ ), 7.14(8H<sub>b</sub>, dd) and 3.69(4H<sub>c</sub>, s). ***rtct-2,4'-tpcb-ht***: <sup>1</sup>H NMR (300 MHz, CDCl<sub>3</sub>),  $\delta_{\text{H}}$ (ppm),  $J$ (Hz): 8.68(2H<sub>a</sub>, ddd,  $J_{\text{ab}}=4.5$ ,  $J_{\text{ac}}=1.8$ ,  $J_{\text{ad}}=0.9$ ), 8.46(4H<sub>e</sub>, dd,  $J_{\text{ef}}=4.7$ ), 7.63(2H<sub>c</sub>, ddd,  $J_{\text{bc}}=7.7$ ), 7.24(4H<sub>f</sub>, m), 7.19(2H<sub>b</sub>, ddd,  $J_{\text{bd}}=1.2$ ), 7.13(2H<sub>d</sub>, ddd) 4.32(2H<sub>g</sub>, t,  $J_{\text{gh}}=9.7$ ) and 3.72(2H<sub>h</sub>, t). ***rtct-2,4'-tpcb-hh***: <sup>1</sup>H NMR (300 MHz, CDCl<sub>3</sub>),  $\delta_{\text{H}}$ (ppm),  $J$ (Hz): 8.66(2H<sub>a</sub>, dd,  $J_{\text{ab}}=4.5$ ,  $J_{\text{ac}}=1.8$ ), 8.50(4H<sub>e</sub>, dd,  $J_{\text{ef}}=6.1$ ), 7.54(2H<sub>c</sub>, td,  $J_{\text{cd}}=7.7$ ,  $J_{\text{bc}}=7.6$ ), 7.24(4H<sub>f</sub>, dd,  $J_{\text{ef}}=6.1$ ), 7.15(2H<sub>b</sub>, m,  $J_{\text{bd}}=1.0$ ), 7.02(2H<sub>d</sub>, d), 4.13(2H<sub>g</sub>, m) and 4.01(2H<sub>h</sub>, m). ***rcct-4-Cl-dpcb-ht***: [*rcct*-1,3-bis(4-pyridyl)-2,4-bis(4-chlorophenyl) cyclobutane] (300 MHz, DMSO),  $\delta_{\text{H}}$ (ppm),  $J$ (Hz): 8.30(4H<sub>a</sub>, d,  $J_{\text{ab}}=5.8$ ), 8.02(2H, s, template (bta)), 7.67(2H<sub>e</sub>, d,  $J_{\text{ef}}=8.4$ ), 7.40(2H<sub>c</sub>, d,  $J_{\text{cd}}=8.5$ ), 7.14(4H<sub>b</sub>, d), 6.94(4H<sub>d,f</sub>, s), 4.95(1H<sub>h</sub>, t,  $J_{\text{ac}}=1.7$ ,  $J_{\text{hg}}=11.8$ ), 4.58(1H<sub>i</sub>, t,  $J_{\text{ig}}=9.0$ ), and 4.36(2H<sub>g</sub>, t).

**Crystal structure determination.** Intensity data were recorded at room temperature on a Rigaku AFC-7S diffractometer equipped with a CCD bidimensional detector using monochromated Mo(K $\alpha$ ) radiation ( $\lambda = 0.71073 \text{ \AA}$ ). An empirical absorption correction (multi-scan) was applied using the package CrystalClear. The structures were solved by Direct Methods and refined by full-matrix least-squares on  $F^2$  using the SHELXTL-PLUS package. Hydrogen atoms on C and N atoms were placed at fixed positions using the HFIX instruction, except for the structure **5**, which were found from the Difference Fourier map. All the H atoms were refined with isotropic displacement parameters set to  $1.2 \times U_{eq}$  of the attached atom. In the crystal structure of **5** water molecules were found disordered. Attempts were made to model this disorder or split it into two positions, but were unsuccessful. PLATON/SQUEZZE routine was used to correct the data for the presence of disordered solvent. A potential solvent volume of  $2132 \text{ \AA}^3$  was found. The stoichiometry of the solvent was calculated to be approximately 5 molecules of water per formula unit, which results in a total of 837 electrons per unit cell. In the crystal structure **6** and **7**, the water molecules found with partial population of 0.64 and 0.31 for **6** and **7**, respectively. The H atoms on the water molecules were not located in the density map in the structure of **7**.

**Figure 1.** Ball and stick representation of the pyridylcyclobutanes found in the structure of **5** (*rtct*-4,4'-tpcb (a) ), **6** (*rtct*-2,4'-tpcb-ht (b) ) and **7** (*rcct*-4-Cl-dpcb-ht)

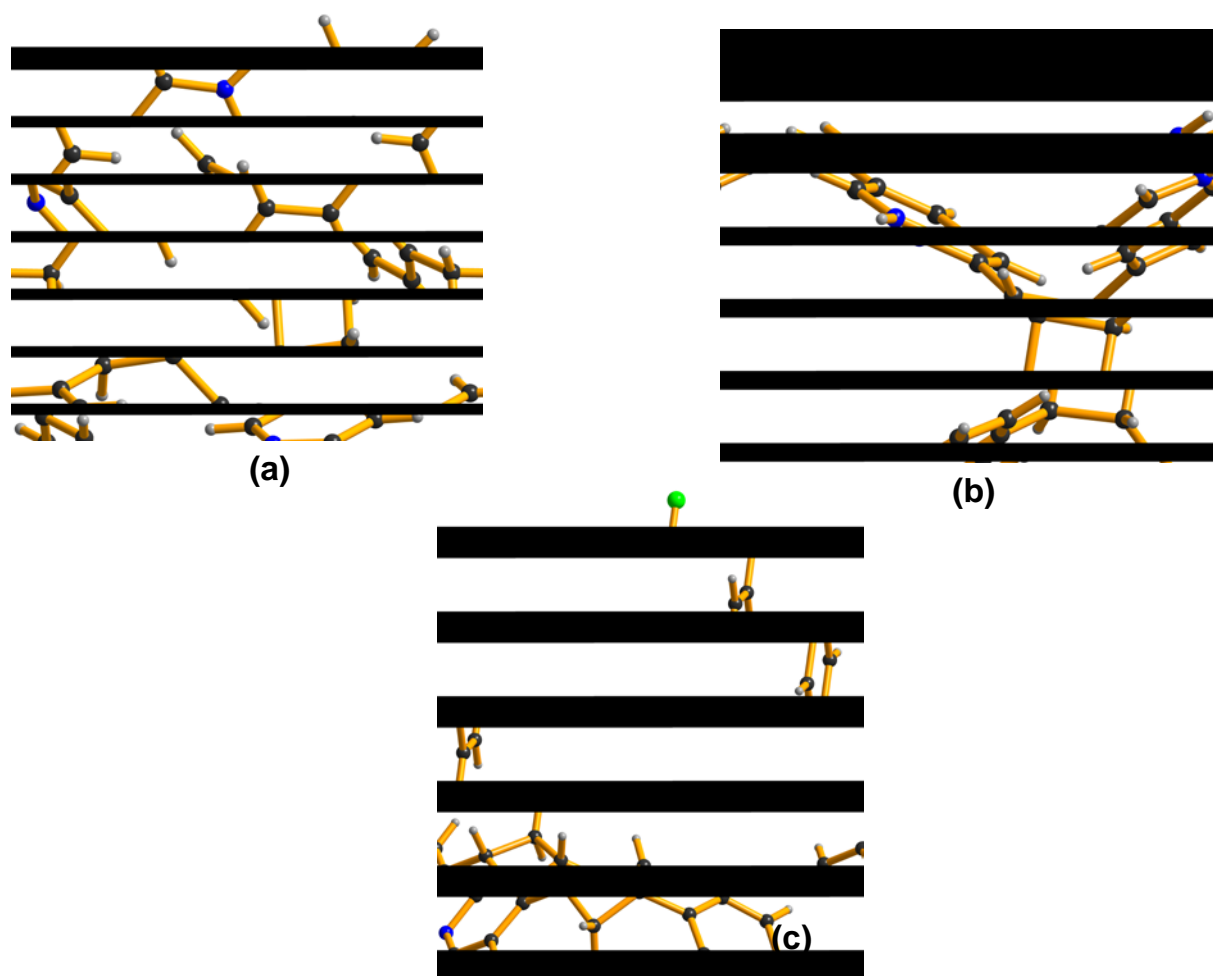

**Figure 2.**  $^1\text{H}$  NMR spectrum of the starting *rctt*-pyridylcyclobutanes *rctt*-2,2'-tpcb (a), *rctt*-4,4'-tpcb (b), *rctt*-2,4'-tpcb-ht(c), *rctt*-2,4'-tpcb-hh (d).

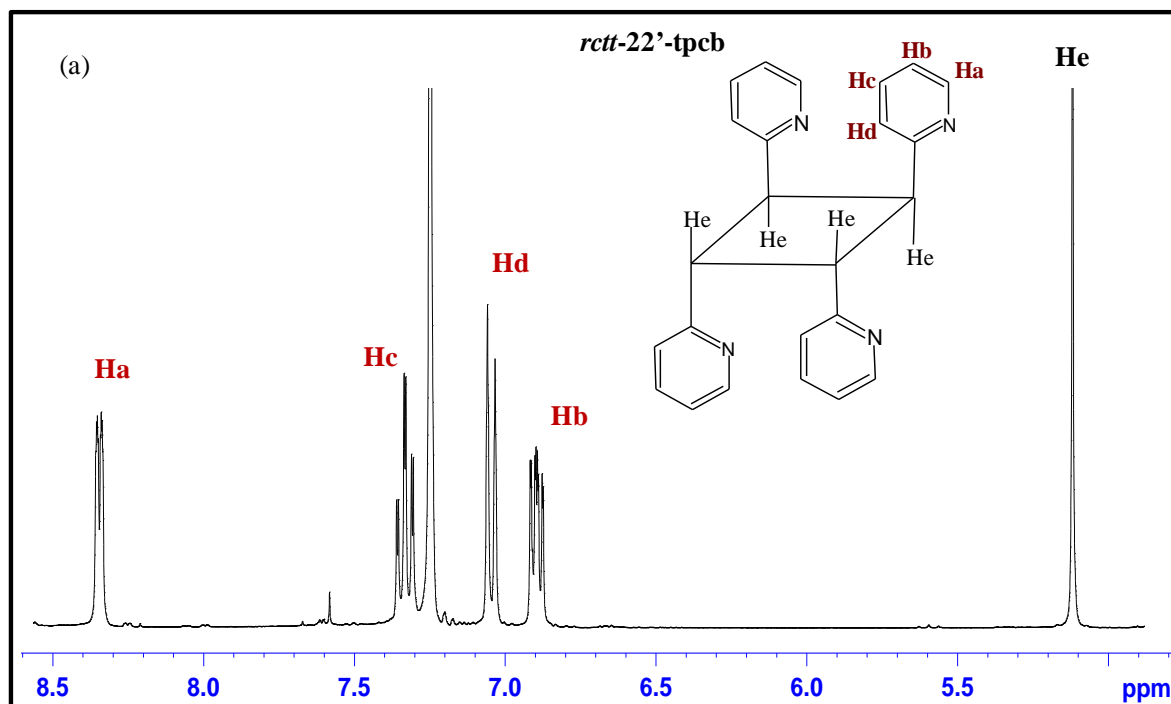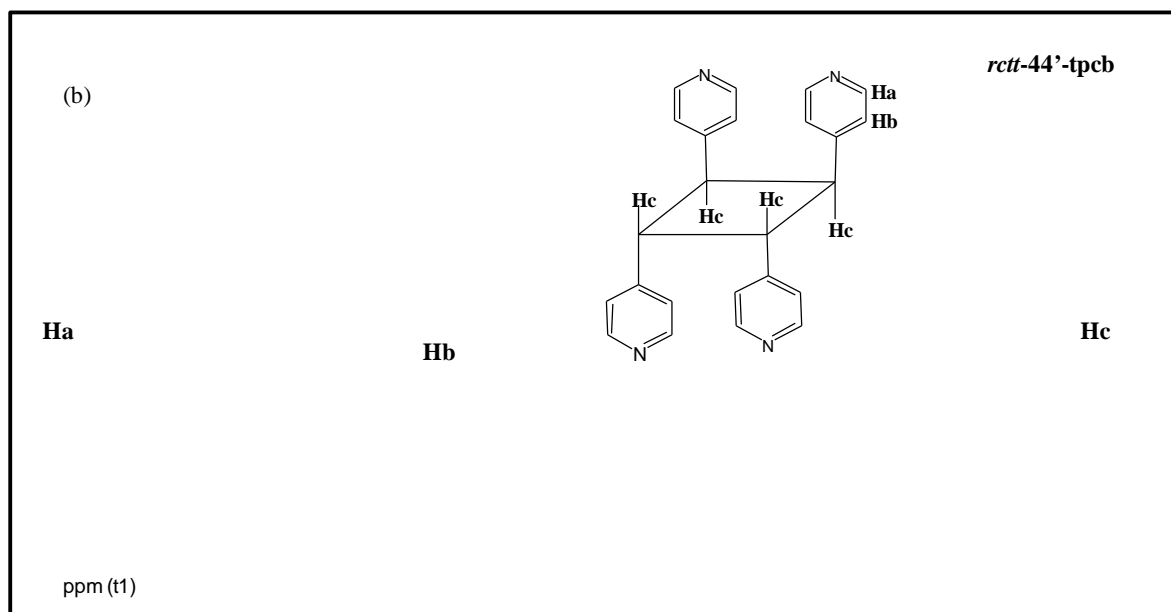

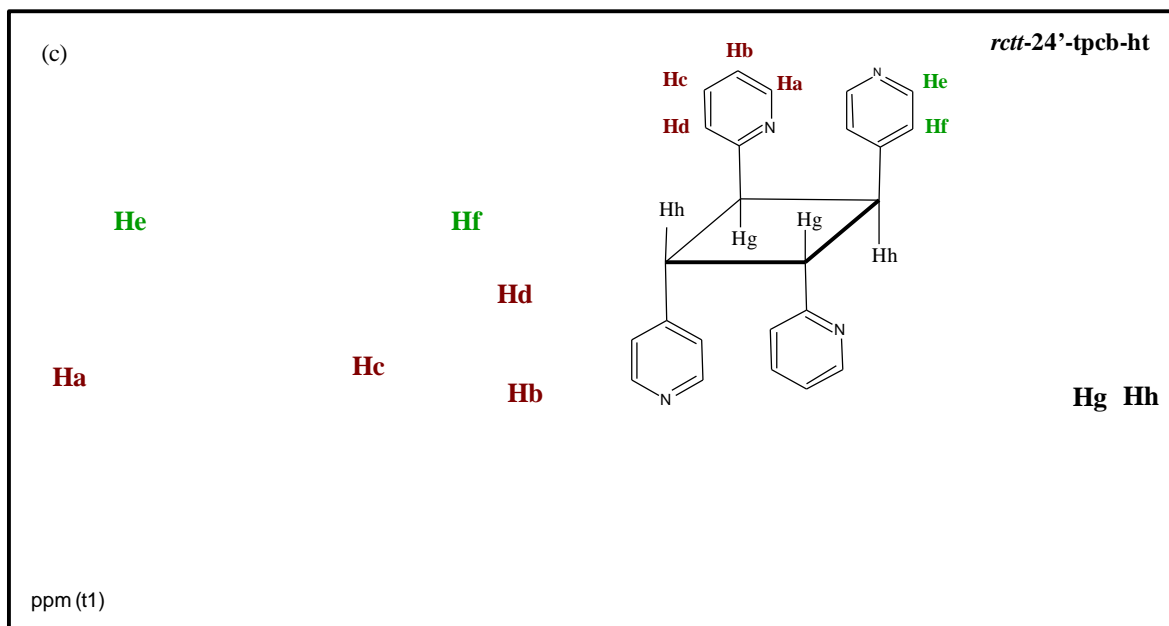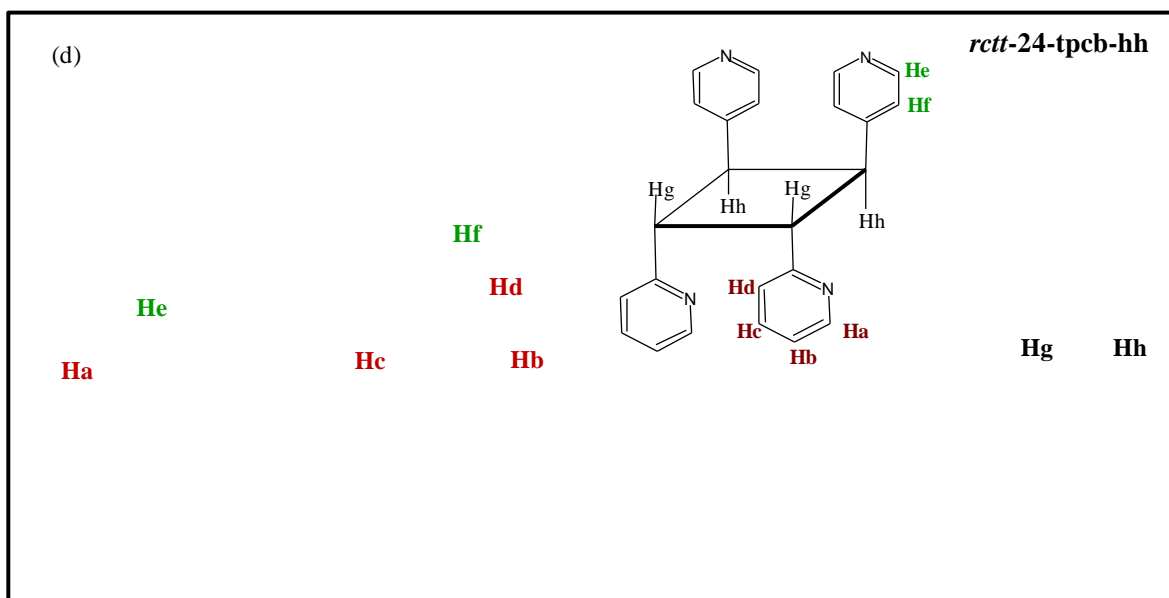

**Figure S3.** (a)  $^1\text{H-NMR}$  spectrum of the mixture of products (*rctt*- and *rtct*- 2,2'-tpcb isomers) obtained from the reflux with  $\text{MnCl}_2 \cdot 4\text{H}_2\text{O}$ . (b)  $^1\text{H-NMR}$  spectrum of the mixture of products (*rctt*- and *rtct*- 2,2'-tpcb isomers) obtained from the reflux with  $\text{AlCl}_3 \cdot 6\text{H}_2\text{O}$ .

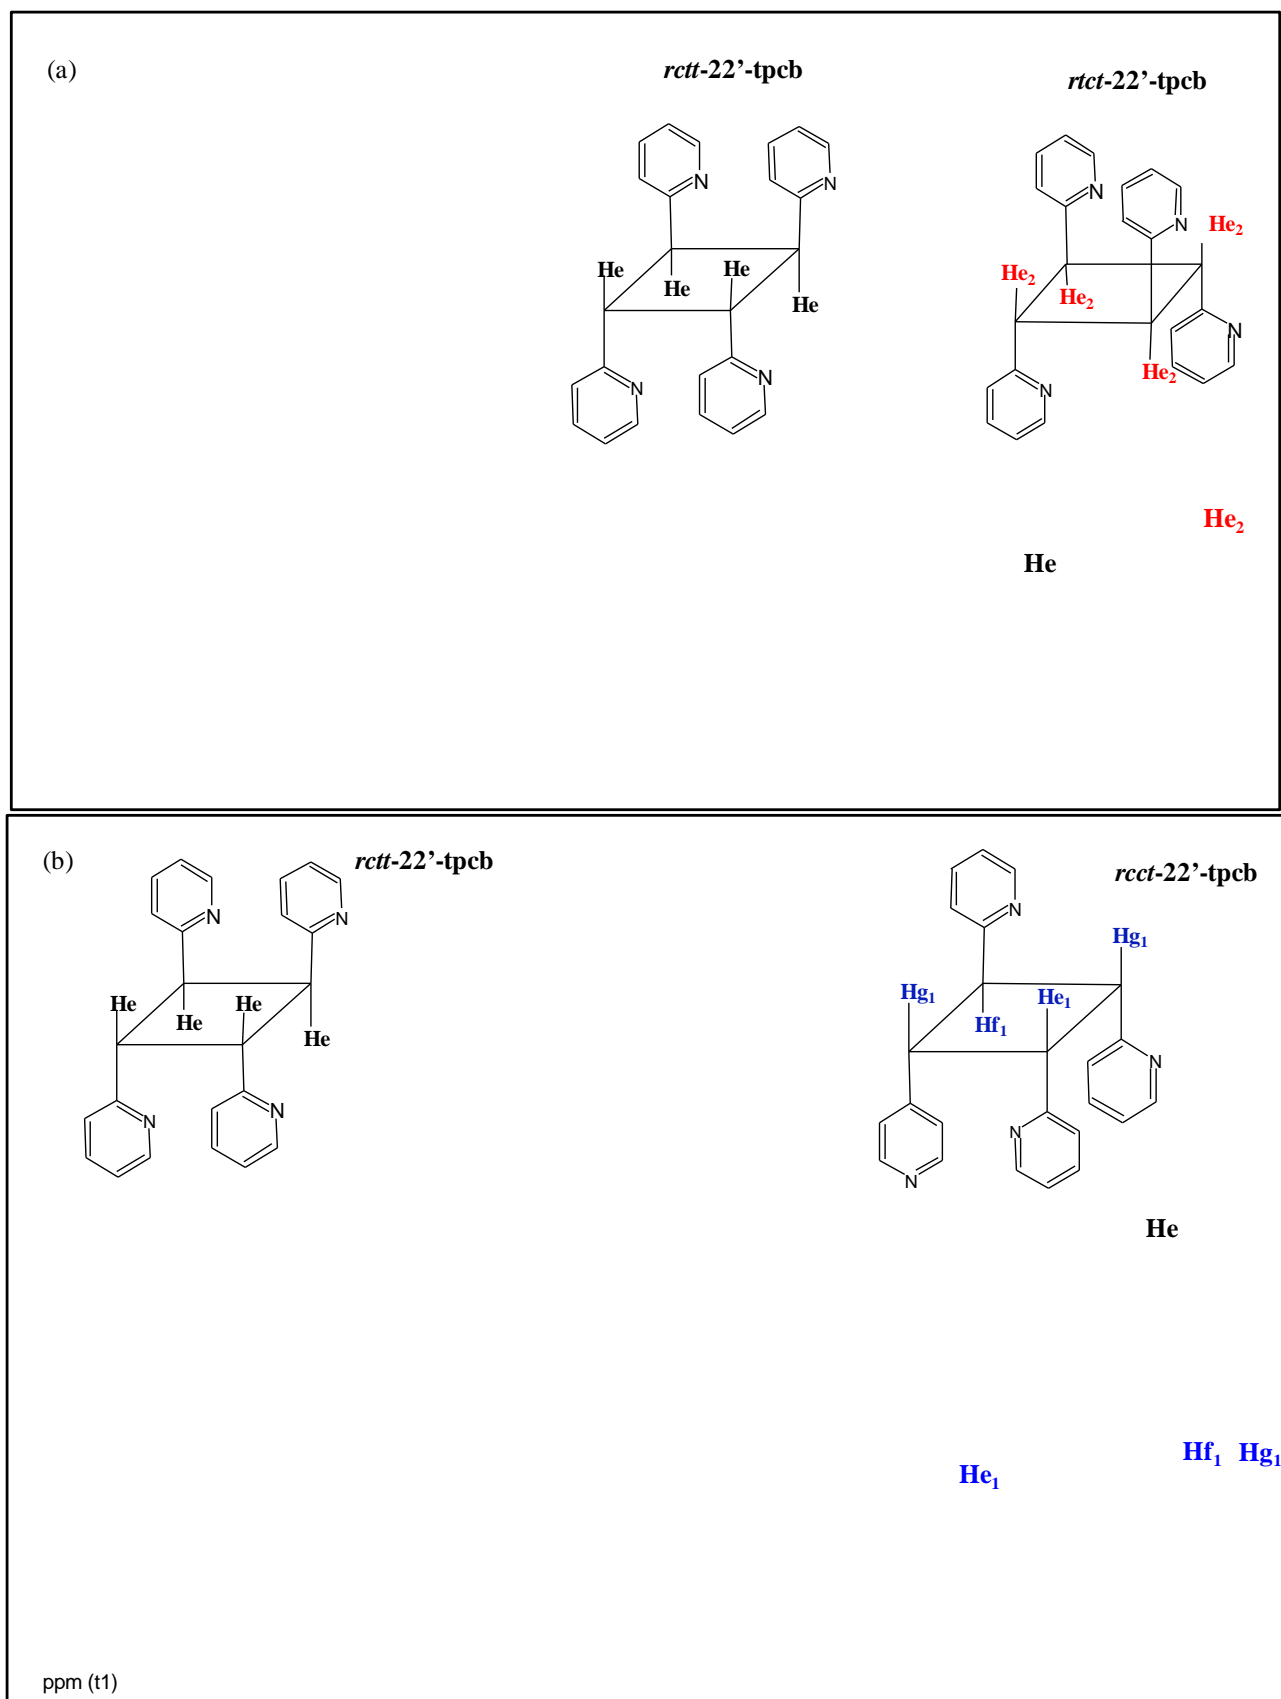



**Figure S4.** (a)  $^1\text{H-NMR}$  spectrum of the isomer *rcctt*-4,4'-tpcb obtained from the reflux with  $\text{MnCl}_2 \cdot 4\text{H}_2\text{O}$ . (b)  $^1\text{H-NMR}$  spectrum of the mixture of products (*rcctt*- and *rcct*-4,4'-tpcb isomers) obtained from the reflux with  $\text{AlCl}_3 \cdot 6\text{H}_2\text{O}$ .

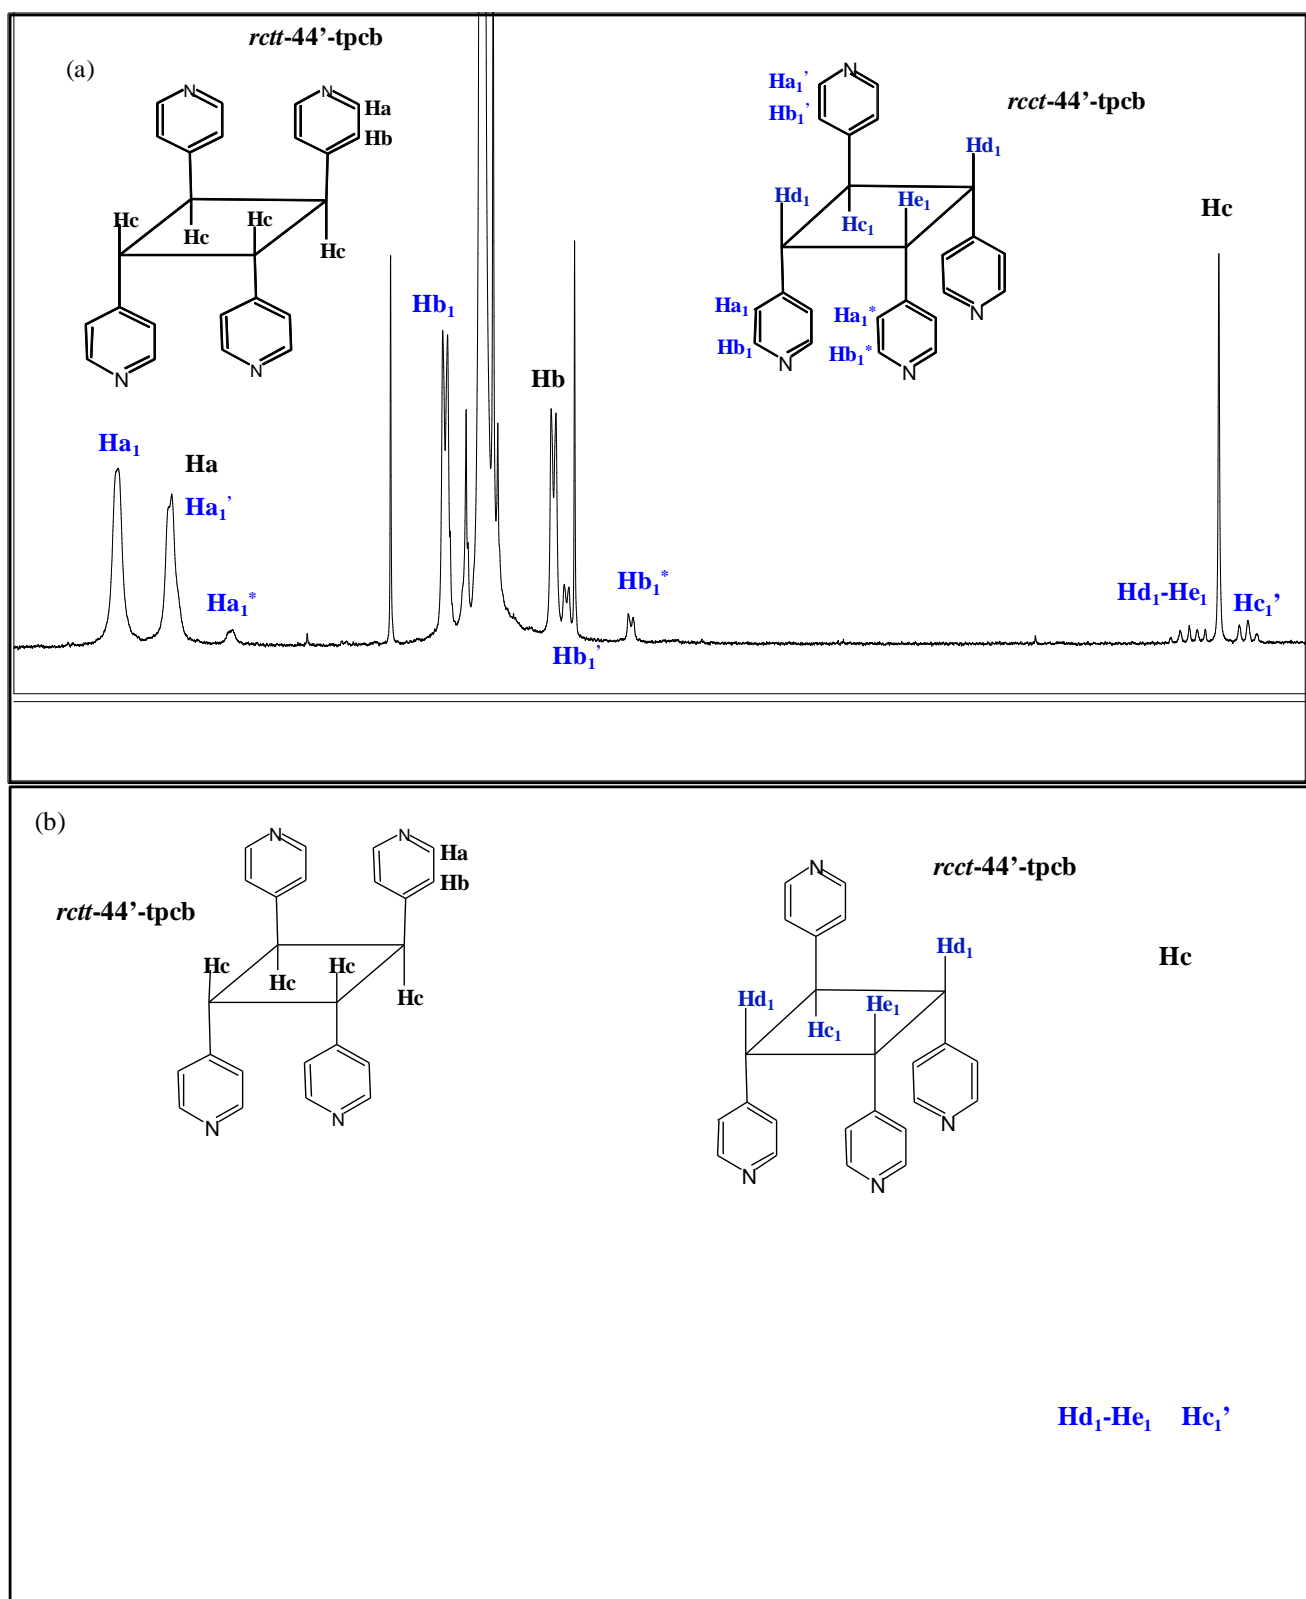

**Figure S5.** (a)  $^1\text{H-NMR}$  spectrum of the mixture of products (*rcctt*- and *rcctt*- 2,4'-tpcb-ht isomers) obtained from the reflux with  $\text{MnCl}_2 \cdot 4\text{H}_2\text{O}$ . (b)  $^1\text{H-NMR}$  spectrum of the mixture of products (*rcctt*-, *rttt* and *rcctt*- 2,4'-tpcb-ht isomers) obtained from the reflux with  $\text{AlCl}_3 \cdot 6\text{H}_2\text{O}$ .

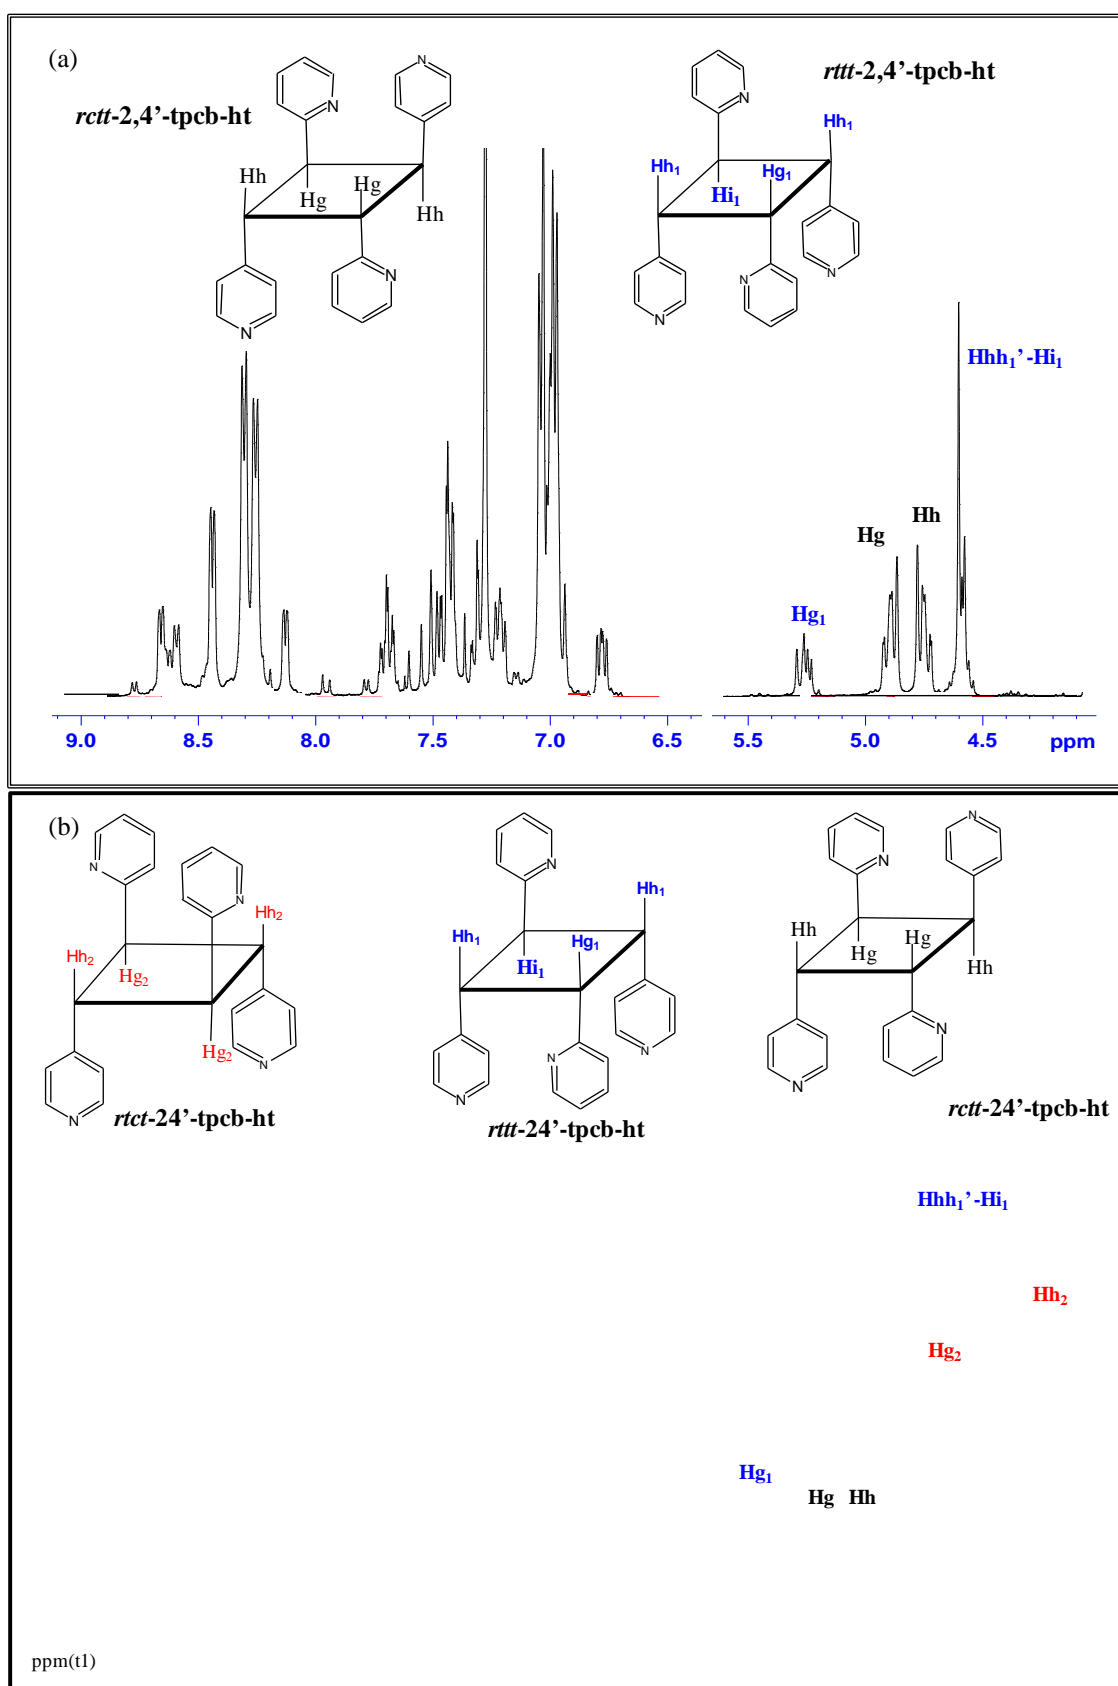

**Figure S6.** a)  $^1\text{H-NMR}$  spectrum of the mixture of products (*rctt*- and *rcct*- 2,4'-tpcb-hh isomers) obtained from the reflux with  $\text{MnCl}_2 \cdot 4\text{H}_2\text{O}$ . (b)  $^1\text{H-NMR}$  spectrum of the mixture of products (*rctt*-, and *rcct* 2,4'-tpcb-hh isomers) obtained from the reflux with  $\text{AlCl}_3 \cdot 6\text{H}_2\text{O}$ .

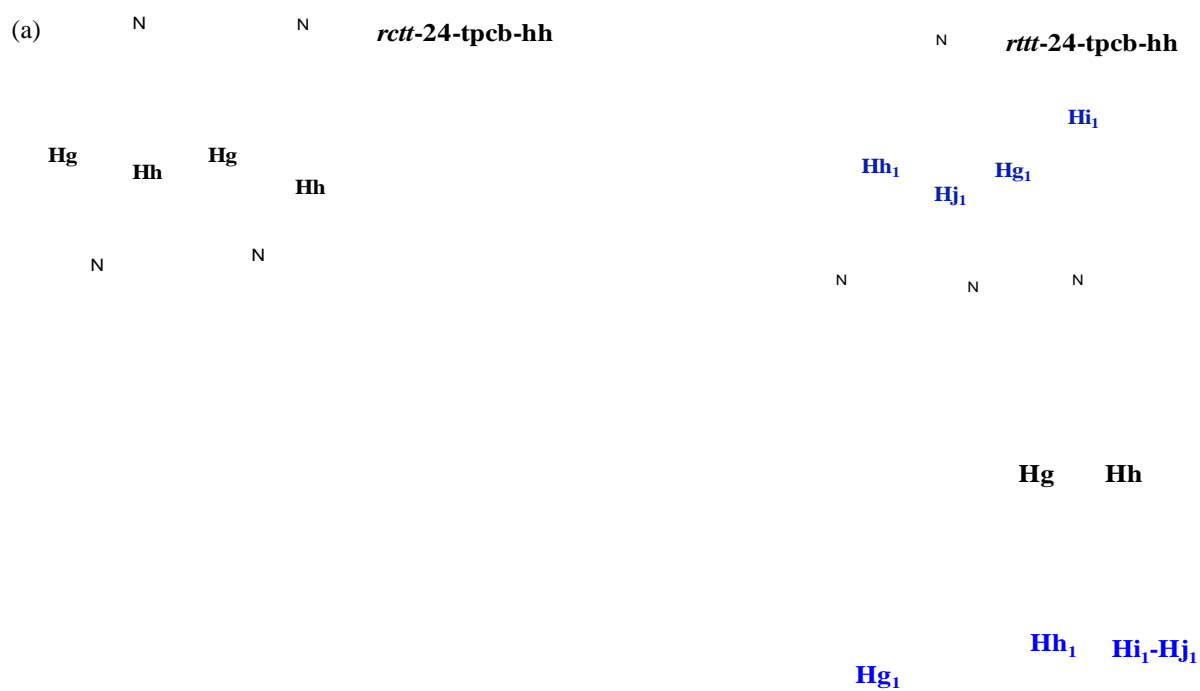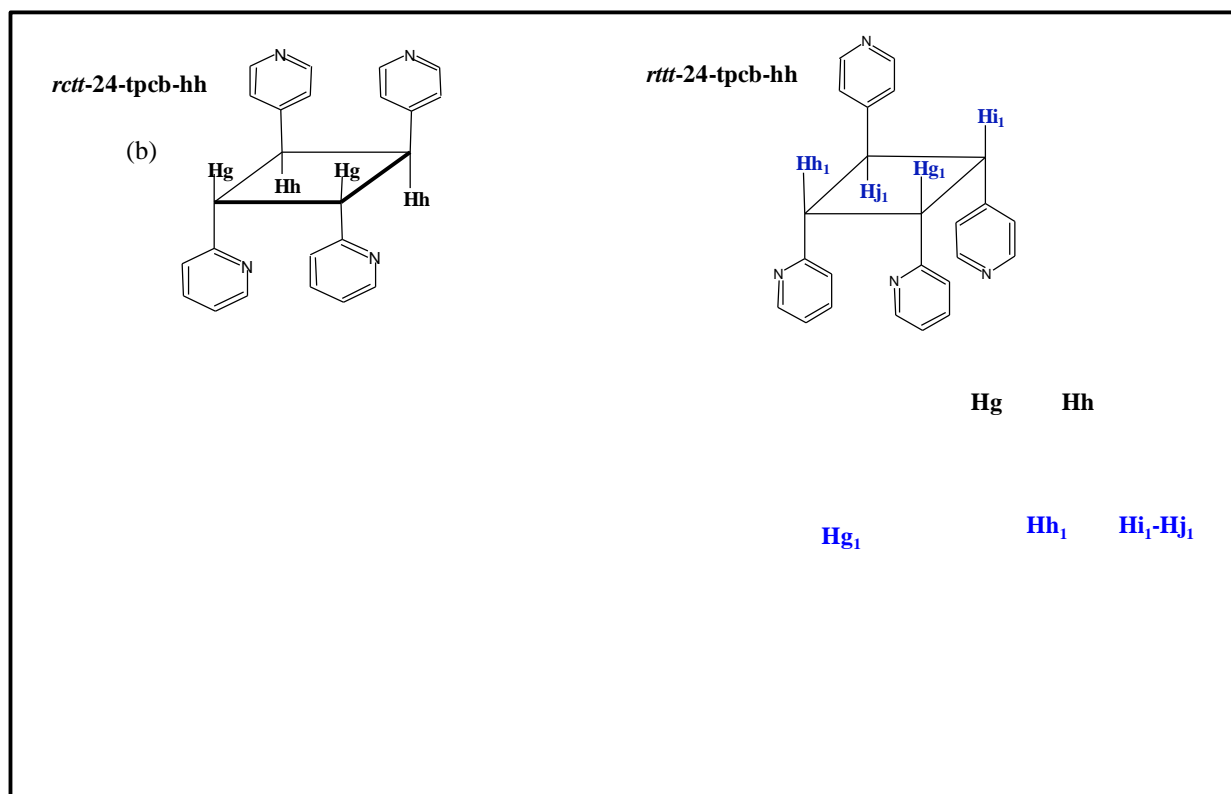

**Figure S7.** Comparative  $^1\text{H}$ -NMR spectrum of the *rctt*-2,2'-tpcb isomer before (a) and after the heating upon hydrothermal conditions either with bta or  $\text{AlCl}_3 \cdot 6\text{H}_2\text{O}$ . Representative  $^1\text{H}$ -NMR spectrum of the *rtct*-2,2'-tpcb isomer (b).

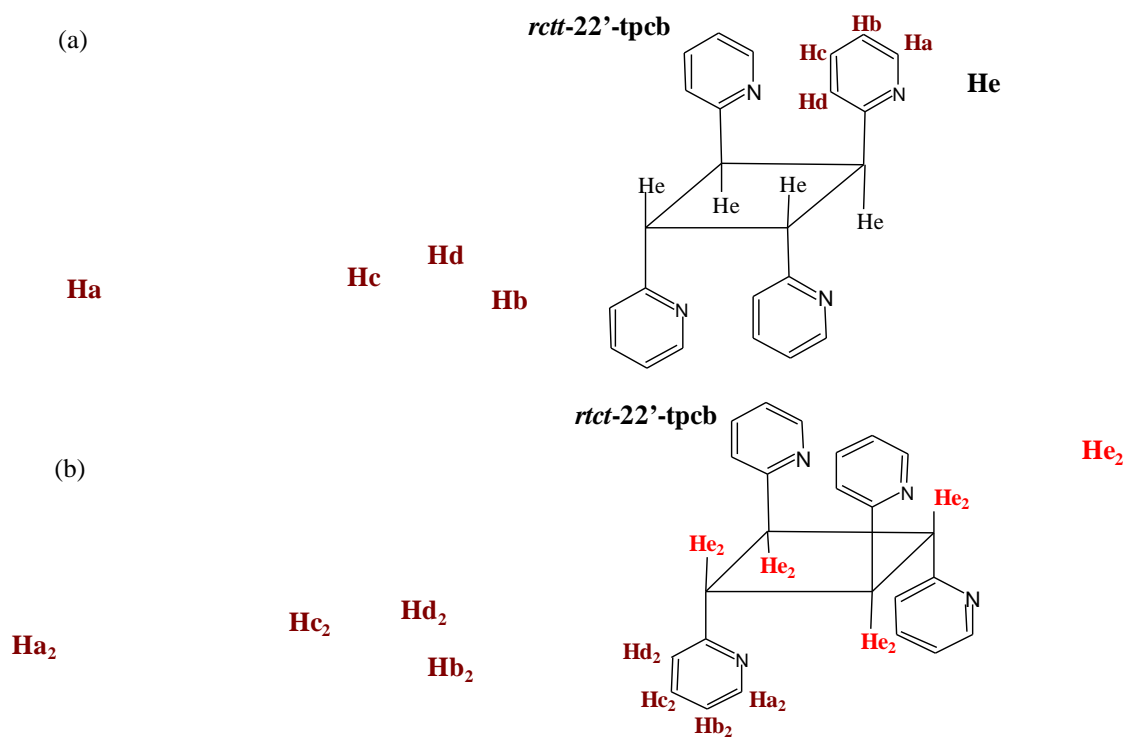

**Figure S8.** Comparative  $^1\text{H}$ -NMR spectrum of the *rctt*-4,4'-tpcb isomer before (a) and after the heating upon hydrothermal conditions either with bta or  $\text{AlCl}_3 \cdot 6\text{H}_2\text{O}$ . Representative  $^1\text{H}$ -NMR spectrum of the *rtct*-4,4'-tpcb isomer (b).

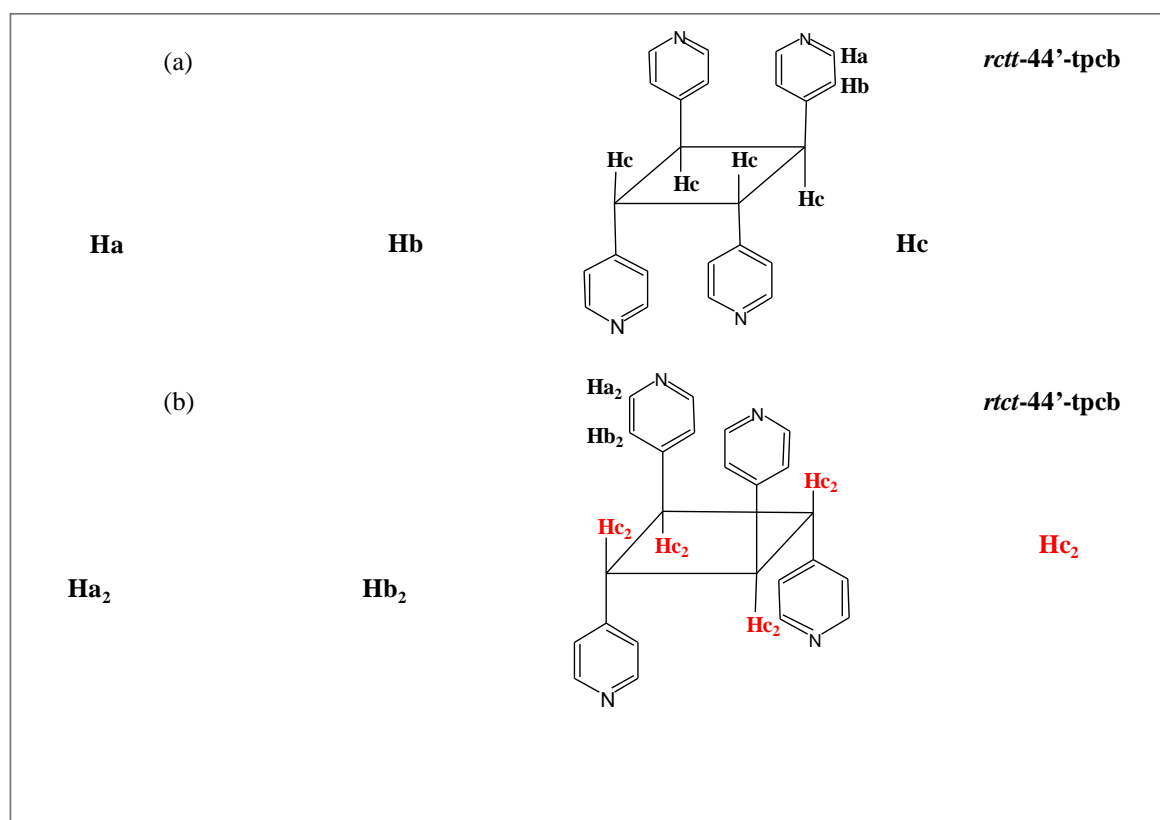

**Figure S9.** Comparative  $^1\text{H-NMR}$  spectrum of the *rtct*-2,4'-tpcb-ht isomer before (a) and after the heating upon hydrothermal conditions either with bta or  $\text{AlCl}_3 \cdot 6\text{H}_2\text{O}$ . Representative  $^1\text{H-NMR}$  spectrum of the *rtct*-2,4'-tpcb-ht isomer (b).

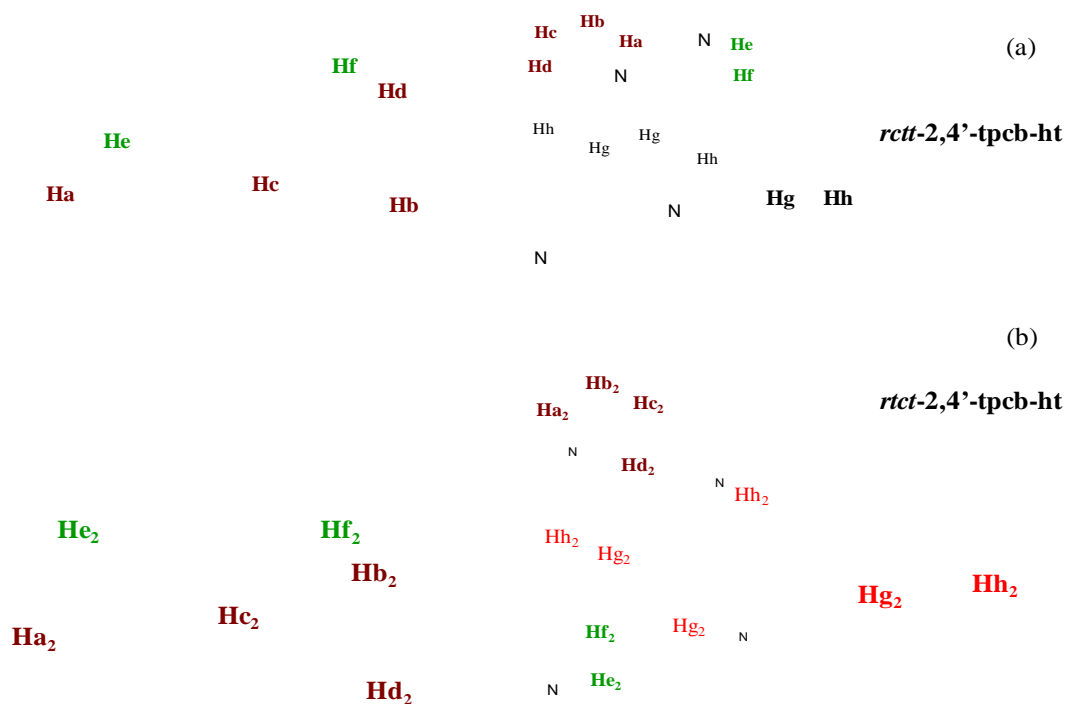

**Figure S10.** Comparative  $^1\text{H-NMR}$  spectrum of the *rtct*-2,4'-tpcb-ht isomer before (a) and after the heating upon hydrothermal conditions either with bta or  $\text{AlCl}_3 \cdot 6\text{H}_2\text{O}$ . Representative  $^1\text{H-NMR}$  spectrum of the *rtct*-2,4'-tpcb-hh isomer (b).

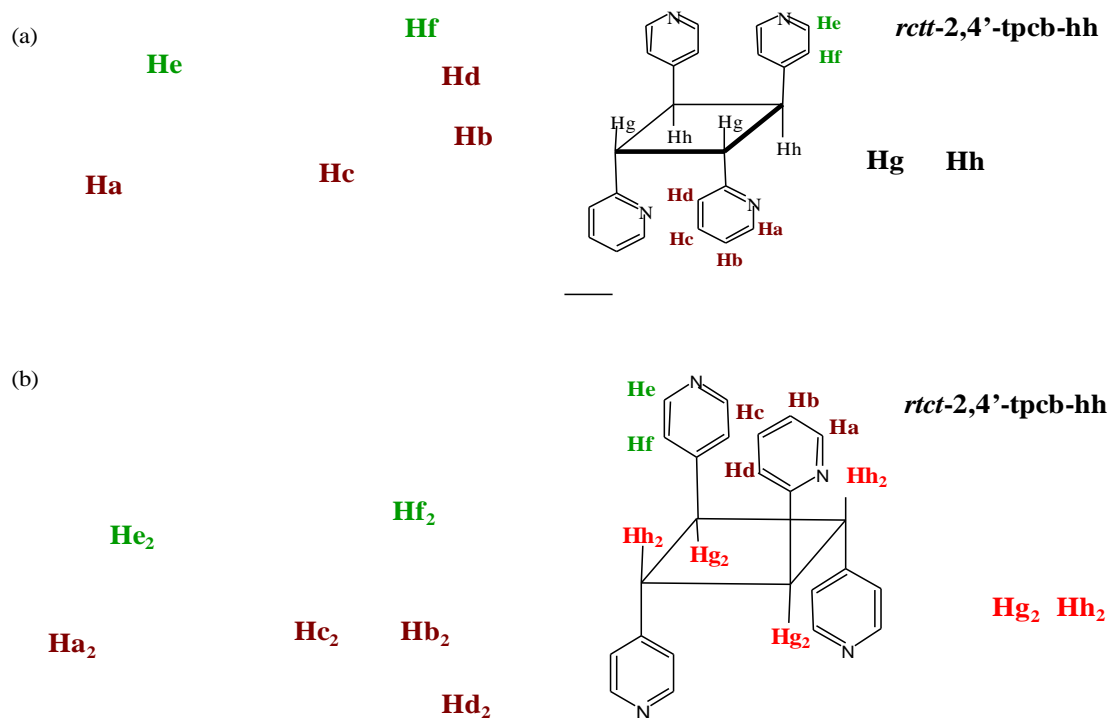

**Figure S11.** Comparative  $^1\text{H}$ -NMR spectrum of the irradiated sample of  $(\text{bta}^{2-})\cdot 2(4\text{-Cl-HStb}^+)$ , containing *rctt*-1,3-bis(4-pyridyl)-2,4-bis(4-chlorophenyl)cyclobutane head-to-tail (*rctt*-4-Cl-dpcb-ht) before (a).  $^1\text{H}$ -NMR spectrum of the mixture of products (*rctt*-, and *rcct*-4-Cl-dpcb-ht isomers) obtained after the heating upon hydrothermal conditions with bta (b). T = template (bta) ; \* = *rctt*-isomer

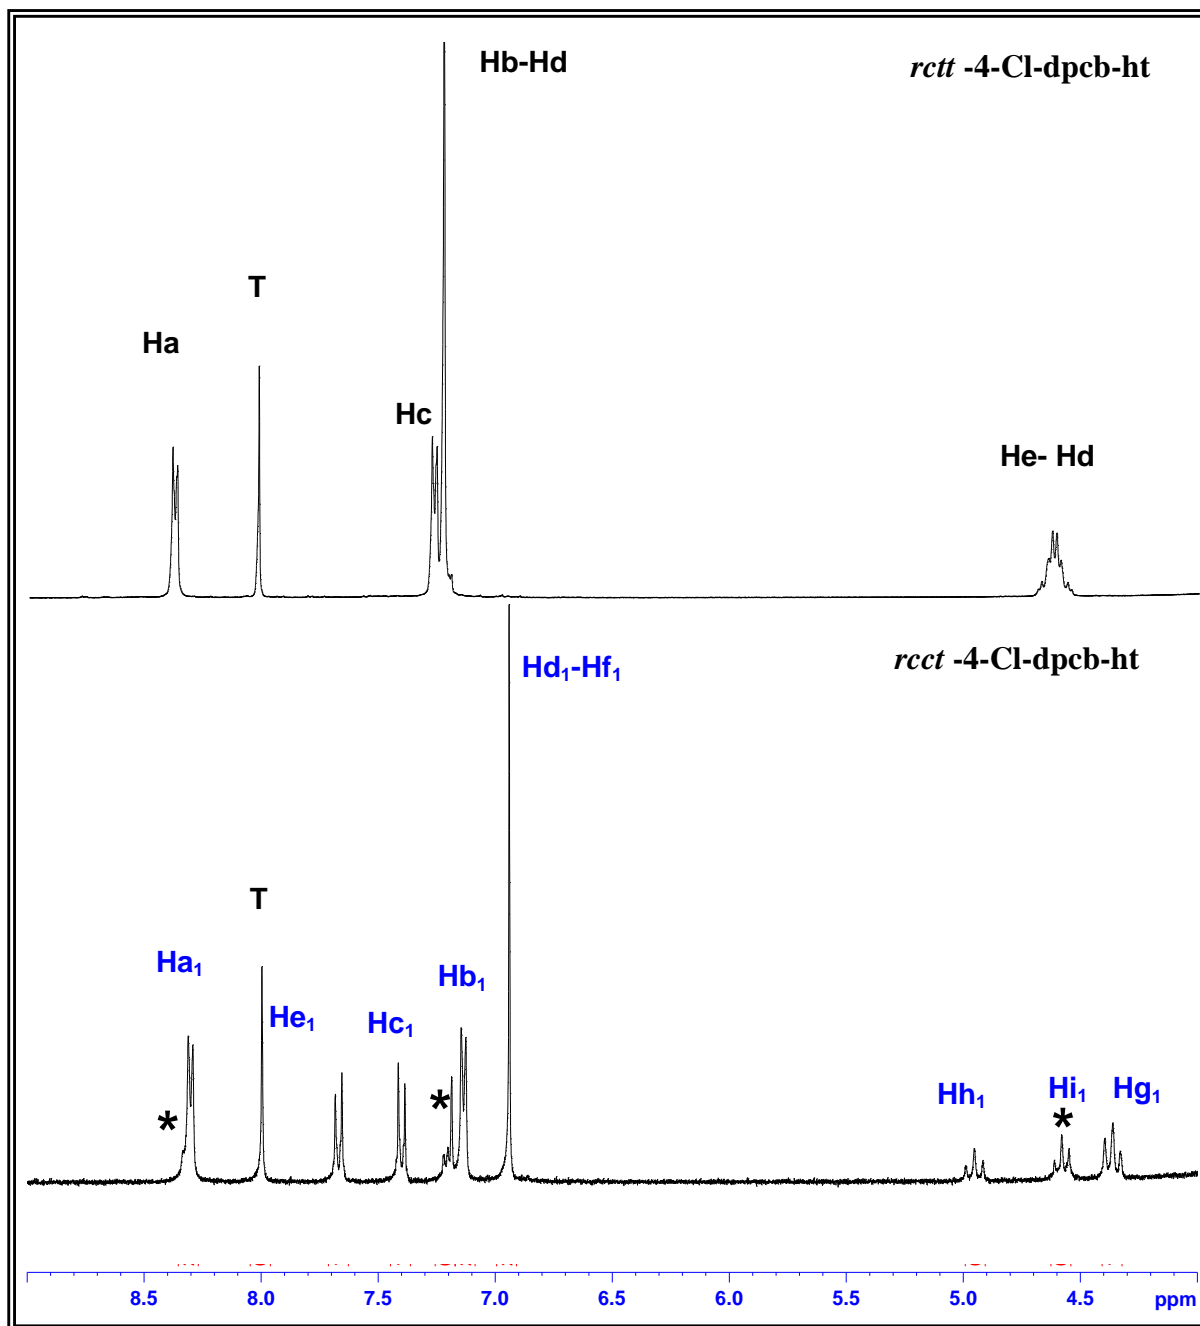

Supplement: c2nj20855e.pdf [file c2nj20855e.pdf]
